# Supplementary material
Source: PubMed Central journal article supplement (PMC3245329)

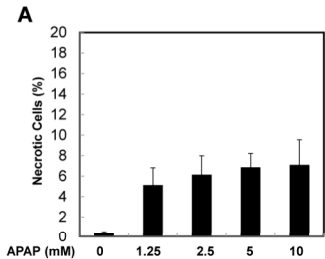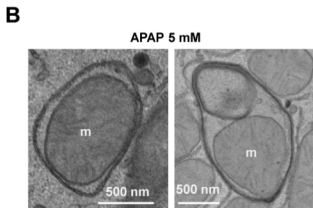

Supplement: NIHMS325164-supplement-01.pdf [file NIHMS325164-supplement-01.pdf]
